# Supplementary material
Source: PubMed Central journal article supplement (PMC8086229)
Supplement: 10875_2021_1031_MOESM1_ESM.pdf [file 10875_2021_1031_MOESM1_ESM.pdf]

Figure 1. IL21R domain structure and patient mutations

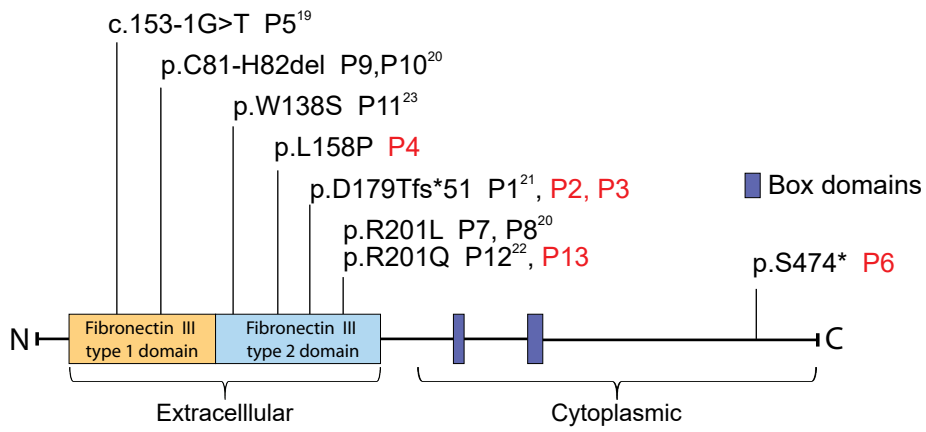

Figure 2: Pathogenic variants mapped onto the crystal structure of the IL-21/IL-21R complex

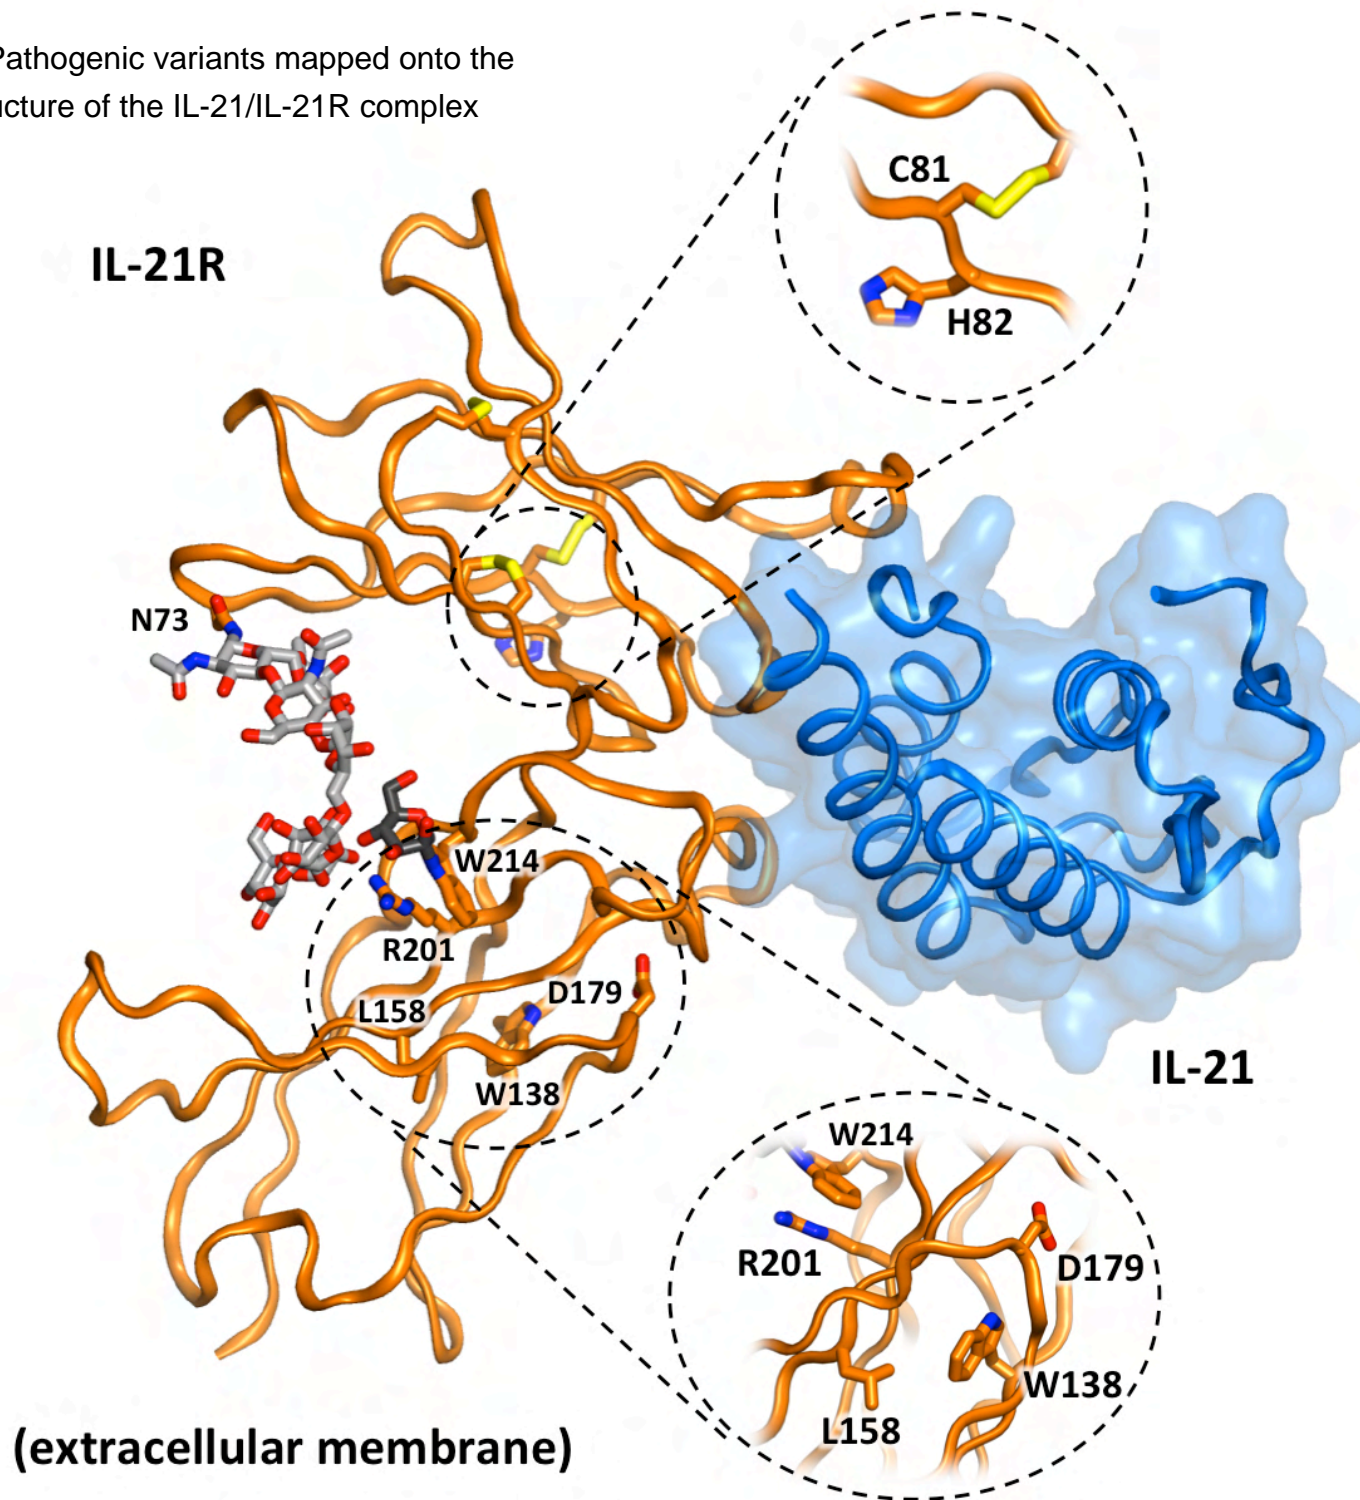

Figure H Clinical features of IL21R deficiency

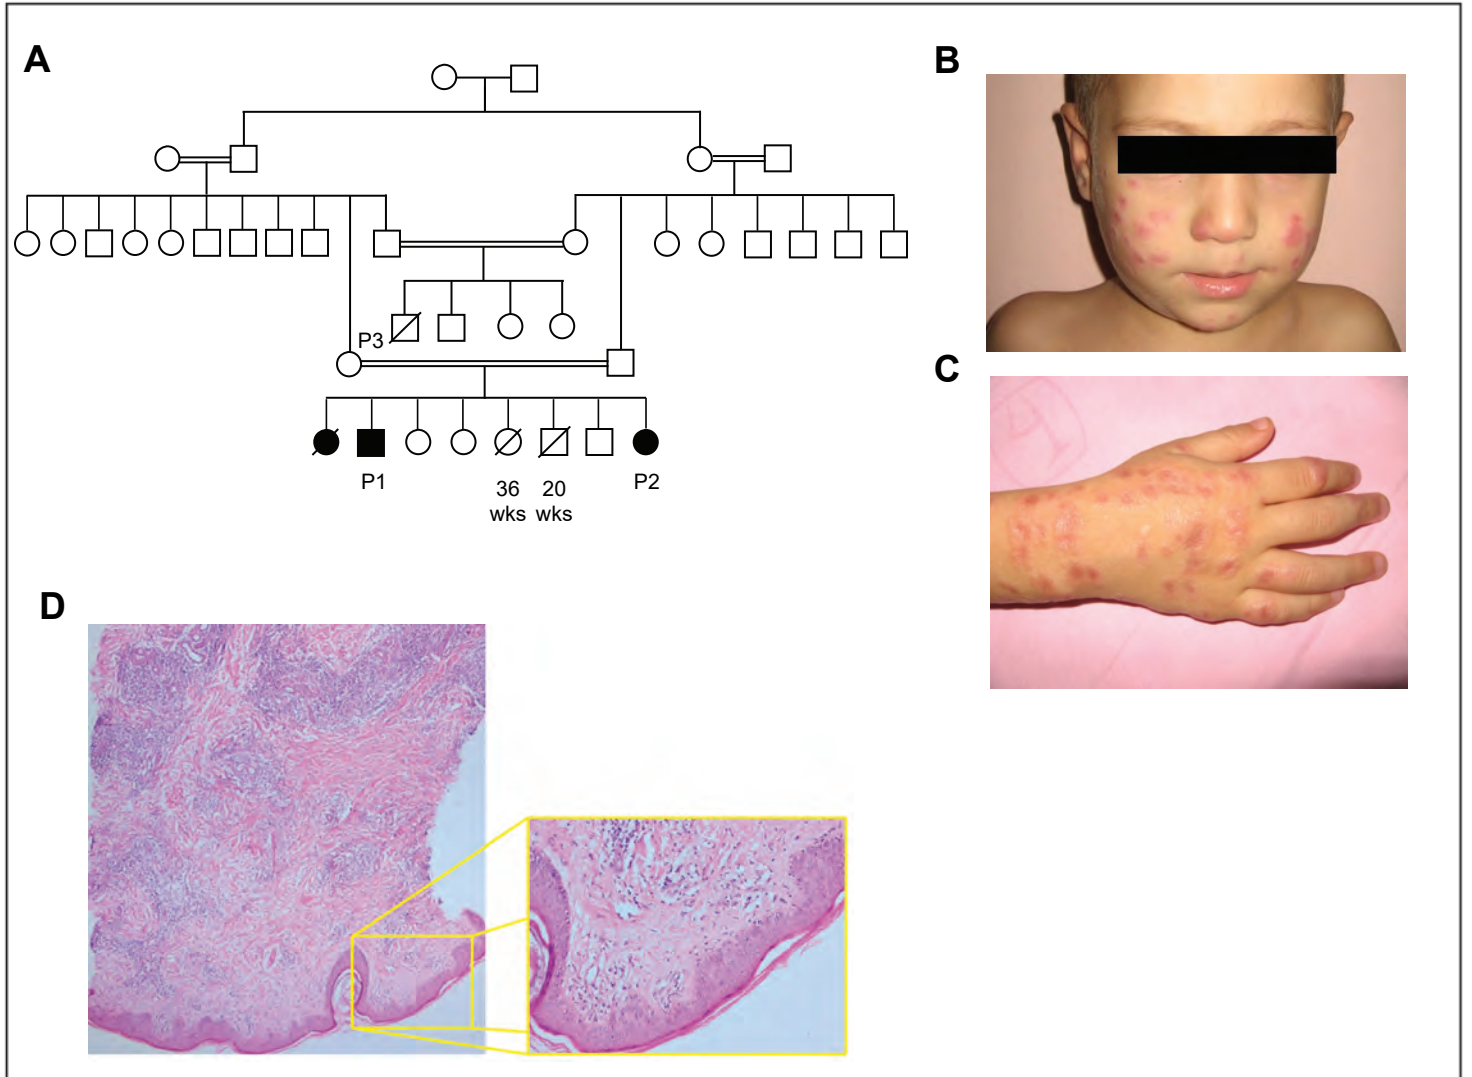

Figure 4: Laboratory features of IL-21R deficient patients

A

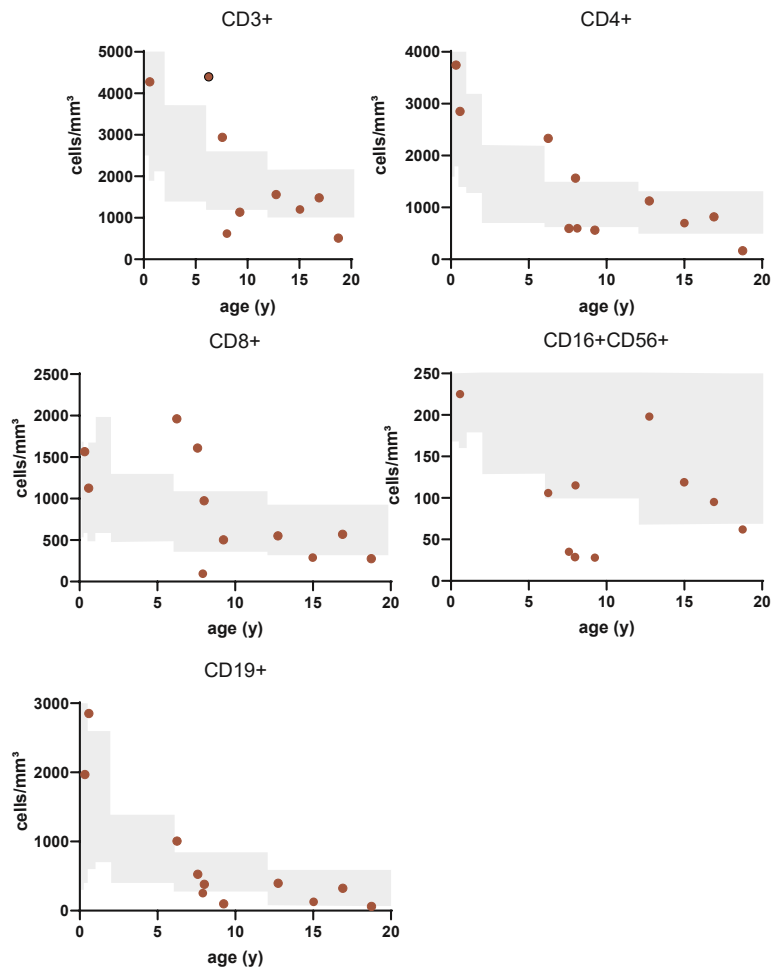

B

|                                           | Increased<br>(no of patients) | Normal<br>(no of patients) | Decreased<br>(no of patients) | Unknown<br>(no of patients) |
|-------------------------------------------|-------------------------------|----------------------------|-------------------------------|-----------------------------|
| <b>Immunoglobulin serum levels</b>        |                               |                            |                               |                             |
| IgG                                       | 1/13 (8%)                     | 3/13 (23%)                 | 9/13 (70%)                    | 0                           |
| IgA                                       | 0                             | 5/12 (42%)                 | 7/12 (58%)                    | 1                           |
| IgE                                       | 5/12 (42%)                    | 7/12 (58%)                 | 0                             | 1                           |
| IgM                                       | 3/12 (25%)                    | 4/12 (33%)                 | 5/12 (42%)                    | 1                           |
| <b>Absolute lymphocyte subpopulations</b> |                               |                            |                               |                             |
| WBC                                       | 5/8 (63%)                     | 2/8 (25%)                  | 1/8 (13%)                     | 5                           |
| ALC                                       | 3/11 (27%)                    | 5/11 (45%)                 | 3/11 (27%)                    | 2                           |
| B cells                                   | 2/11 (18%)                    | 6/11 (55%)                 | 3/11 (27%)                    | 2                           |
| T cells                                   | 2/9 (22%)                     | 4/9 (44%)                  | 3/9 (33%)                     | 4                           |
| CD4+ cells                                | 2/11 (18%)                    | 5/11 (45%)                 | 4/11 (36%)                    | 2                           |
| CD8+ cells                                | 2/11 (18%)                    | 6/11 (55%)                 | 3/11 (27%)                    | 2                           |
| CD4-CD8- cells                            | 3/11 (27%)                    | 8/11 (73%)                 | 0                             | 2                           |
| CD16+CD56+ NK cells                       | 0                             | 6/10 (60%)                 | 4/10 (40%)                    | 3                           |

WBC, white blood cell count; ALC, all lymphocyte count.

Figure 1 KIL21R mutations impact Tfh, Th17, MAIT cells formation and NK cell differentiation

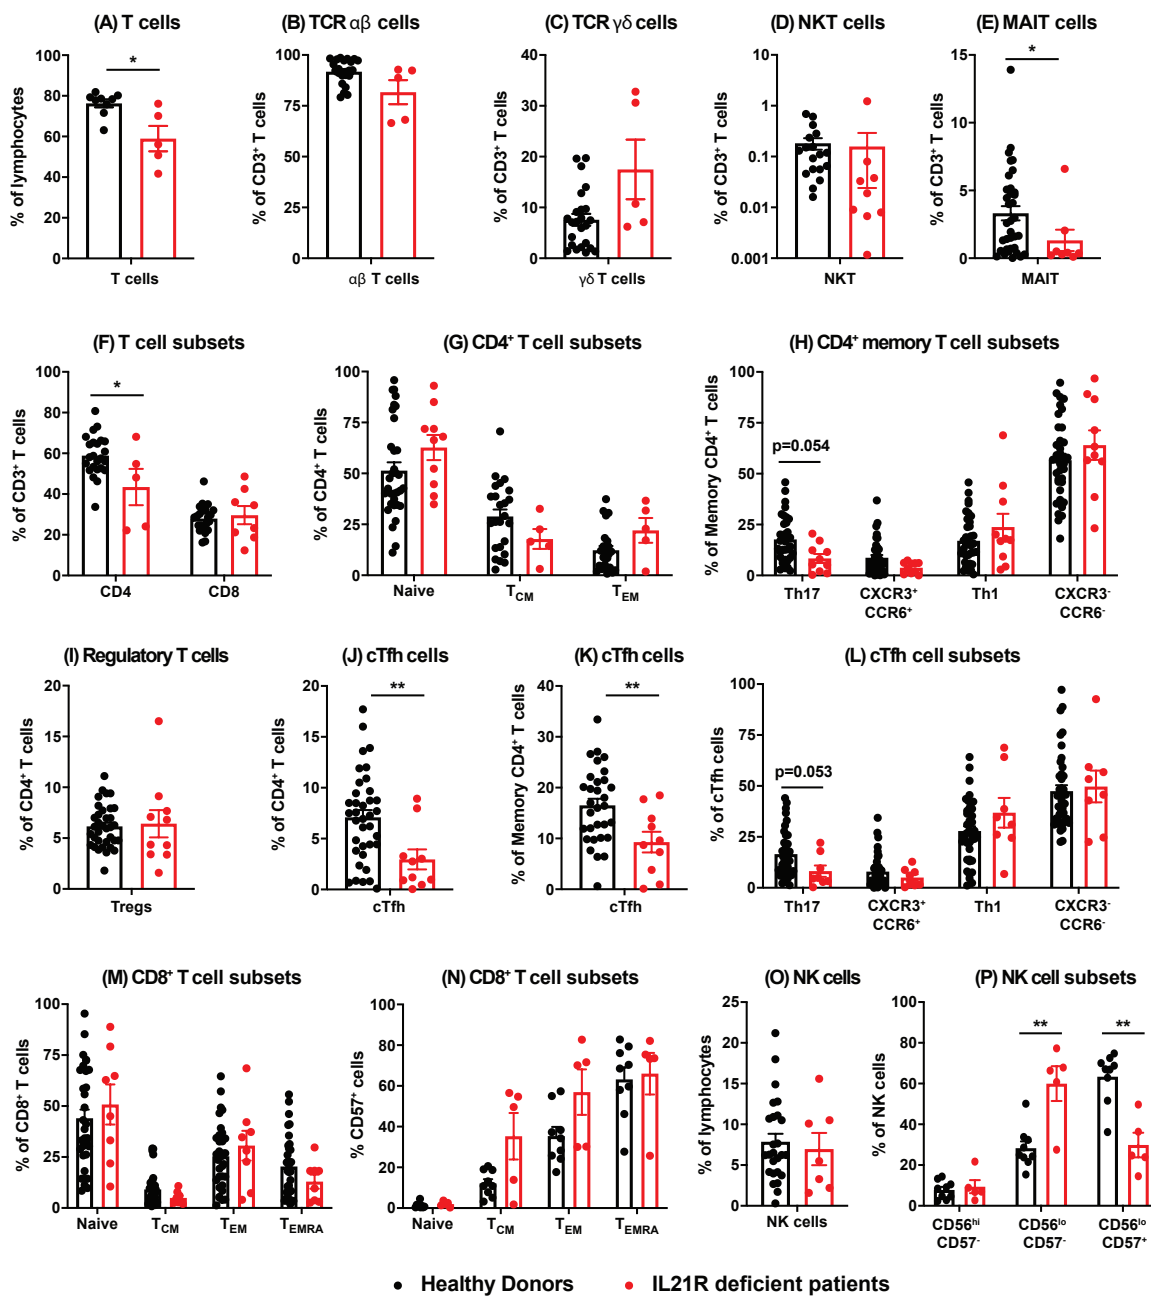

Figure 1: Impaired generation of memory B cells and induction of class switching due to IL-21R deficiency

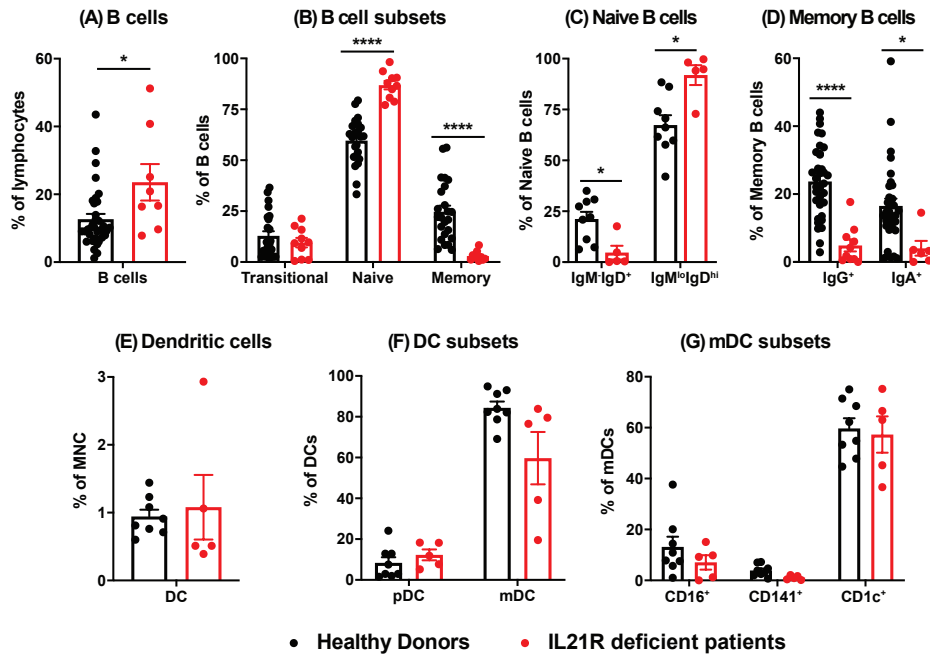

Figure +

(A) Memory CD4<sup>+</sup> T cells: Th17 cytokines

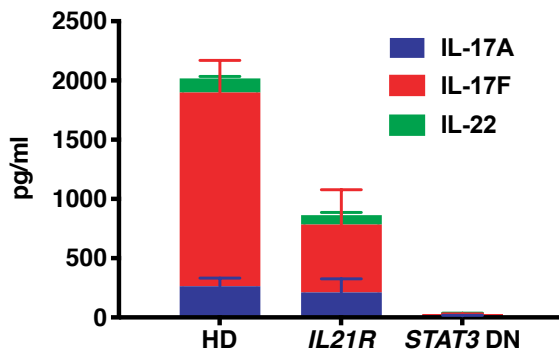

(B) Naive CD4<sup>+</sup> T cells: Th17 cytokines

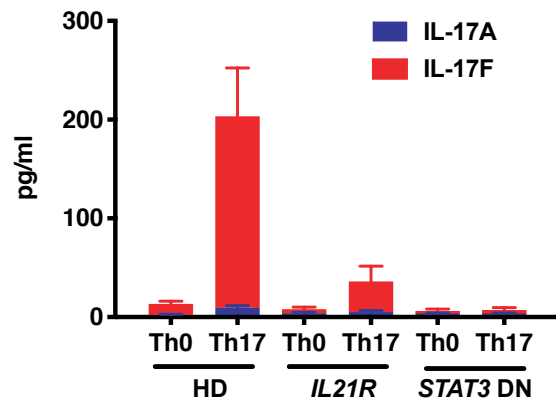

(C) Memory CD4<sup>+</sup> T cells: Th2 cytokines

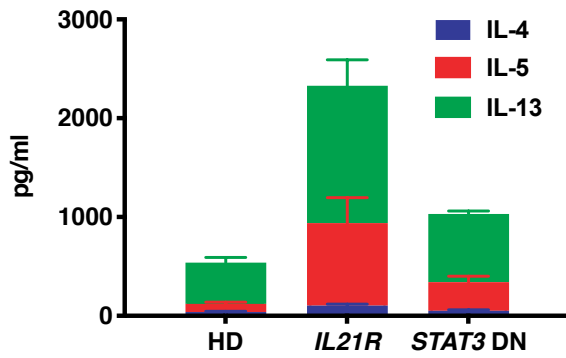

(D) Naive CD4<sup>+</sup> T cells: IL-21 (Tfh)

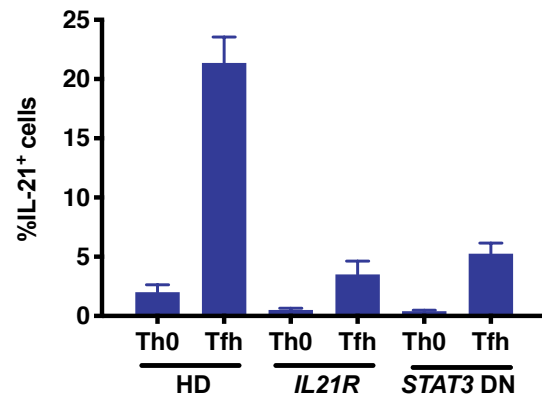

(E) Naive B cells: IgM secretion

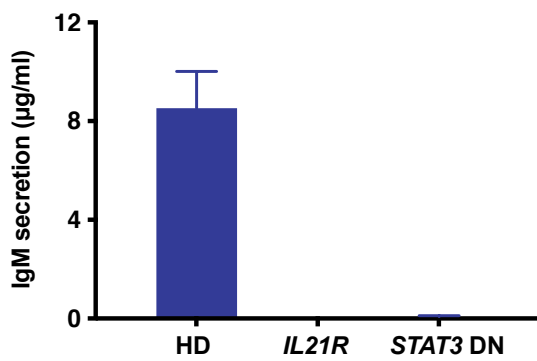

(F) Naive B cells: Ig class switching

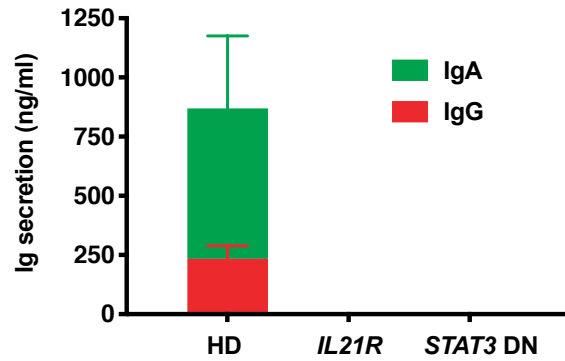

Supplementary Figure 1: Age at disease onset of novel and previously published IL21R deficiency patients

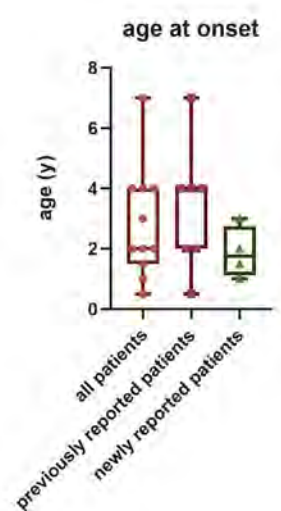

Supplementary Figure 2: Cutaneous rash resembling lupus in P5

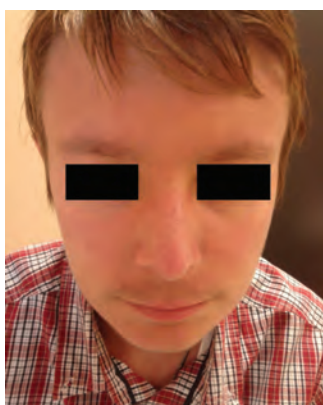



Table I. Clinical features and outcome in IL21R deficiency

| Patient                                    | total n (%)                                           | P1                                          | P2                                          | P3                                                    | P4                                                              | P5                                                                       | P6                                                                             | P7                                                         | P8                                                                | P9                                                                | P10                                                           | P11                                              | P12                 | P13          |
|--------------------------------------------|-------------------------------------------------------|---------------------------------------------|---------------------------------------------|-------------------------------------------------------|-----------------------------------------------------------------|--------------------------------------------------------------------------|--------------------------------------------------------------------------------|------------------------------------------------------------|-------------------------------------------------------------------|-------------------------------------------------------------------|---------------------------------------------------------------|--------------------------------------------------|---------------------|--------------|
| First description                          | Erman 2015                                            | novel                                       | novel                                       | novel                                                 | novel                                                           | Kotlarz 2014                                                             | novel                                                                          | Kotlarz 2013                                               | Kotlarz 2013                                                      | Kotlarz 2013                                                      | Kotlarz 2013                                                  | Ives 2013                                        | Stepensky 2015      | novel        |
| Age                                        | 11                                                    | 1                                           | 8*                                          | 9                                                     | 19*                                                             | 19                                                                       | 4*                                                                             | 10*                                                        | 18*                                                               | 9*                                                                | 15*                                                           | 15                                               | 6                   |              |
| Sex                                        | male                                                  | female                                      | male                                        | male                                                  | male                                                            | female                                                                   | male                                                                           | male                                                       | male                                                              | male                                                              | male                                                          | female                                           | female              | female       |
| Age of onset (years)                       | 0.5                                                   | -***                                        | 1                                           | 1.5                                                   | 4                                                               | 2                                                                        | 2                                                                              | 4                                                          | 5                                                                 | 3                                                                 | 3                                                             | 2                                                | -***                |              |
| Age at diagnosis (years)                   | 5                                                     | 1                                           | 2                                           | 6                                                     | 19                                                              | 19                                                                       | n/a                                                                            | n/a                                                        | 13                                                                | 8                                                                 | 13                                                            | 8                                                | 0.3                 |              |
| consanguinity                              | +                                                     | +                                           | +                                           | +                                                     | +                                                               | +                                                                        | +                                                                              | +                                                          | +                                                                 | +                                                                 | +                                                             | +                                                | +                   | +            |
| Bacterial infections                       |                                                       |                                             |                                             |                                                       |                                                                 |                                                                          |                                                                                |                                                            |                                                                   |                                                                   |                                                               |                                                  |                     |              |
| Recurrent bacterial respiratory infections | 11 (84.6)                                             | +                                           |                                             | +                                                     | +                                                               | +                                                                        | +                                                                              | +                                                          | +                                                                 | +                                                                 | +                                                             | +                                                | +                   | +            |
| Bronchiectasis                             | 6 (46.2)                                              |                                             |                                             |                                                       | +                                                               | +                                                                        | +                                                                              |                                                            |                                                                   | +                                                                 |                                                               | +                                                | +                   |              |
| Recurrent otitis media                     | 6 (46.2)                                              | +                                           |                                             |                                                       |                                                                 | +                                                                        |                                                                                |                                                            |                                                                   | +                                                                 | +                                                             | +                                                | +                   |              |
| Respiratory mycobacterial infections       | 2 (15.4)                                              |                                             |                                             |                                                       |                                                                 | M. tuberculosis                                                          |                                                                                |                                                            |                                                                   | M. massilense                                                     |                                                               |                                                  |                     |              |
| Fungal infections                          |                                                       |                                             |                                             |                                                       |                                                                 |                                                                          |                                                                                |                                                            |                                                                   |                                                                   |                                                               |                                                  |                     |              |
| Fungal respiratory infections              | 5 (38.5)                                              |                                             |                                             | P. jirovecii                                          |                                                                 |                                                                          | +                                                                              |                                                            |                                                                   | P. jirovecii                                                      |                                                               | P. jirovecii                                     |                     | P. jirovecii |
| Candidiasis                                | 5 (38.5)                                              |                                             |                                             | esophageal                                            |                                                                 |                                                                          | hepatosplenic                                                                  |                                                            | esophageal                                                        |                                                                   | esophageal                                                    | systemic                                         |                     |              |
| Parasitic infestations                     |                                                       |                                             |                                             |                                                       |                                                                 |                                                                          |                                                                                |                                                            |                                                                   |                                                                   |                                                               |                                                  |                     |              |
| Cryptosporidiosis associated cholangitis   | 6 (46.2)                                              | +                                           |                                             |                                                       |                                                                 |                                                                          |                                                                                | +                                                          | +                                                                 | +                                                                 | +                                                             | +                                                |                     |              |
| Cryptosporidiosis intestinal inflammation  | 5 (38.5)                                              | +                                           |                                             | +                                                     |                                                                 |                                                                          |                                                                                |                                                            | +                                                                 | +                                                                 | +                                                             |                                                  |                     |              |
| Viral infections                           |                                                       |                                             |                                             |                                                       |                                                                 |                                                                          |                                                                                |                                                            |                                                                   |                                                                   |                                                               |                                                  |                     |              |
|                                            |                                                       |                                             |                                             |                                                       | rubella persistence                                             | CMV pneumonia, CMV retinitis,                                            |                                                                                |                                                            |                                                                   | chronic norovirus infection                                       |                                                               | chronic norovirus infection                      | CMV infection       |              |
| Inflammatory complications                 |                                                       |                                             |                                             |                                                       |                                                                 |                                                                          |                                                                                |                                                            |                                                                   |                                                                   |                                                               |                                                  |                     |              |
| Liver fibrosis                             | 2 (18.2)                                              |                                             |                                             |                                                       |                                                                 |                                                                          |                                                                                | +                                                          | +                                                                 |                                                                   |                                                               |                                                  |                     |              |
| Failure to thrive                          | 5 (38.5)                                              | +                                           |                                             | +                                                     |                                                                 |                                                                          |                                                                                |                                                            | +                                                                 | +                                                                 | +                                                             |                                                  |                     |              |
| Asthma                                     | 3 (23.1)                                              |                                             |                                             |                                                       | +                                                               | +                                                                        | +                                                                              |                                                            |                                                                   |                                                                   |                                                               |                                                  |                     |              |
| Other                                      |                                                       |                                             |                                             | polydactyly, celiac-like findings, giardiasis         | recurrent bronchiolitis, hepatomegaly                           | mediastinal and intestinal lymphadenopathy, lupus-like skin inflammation | food allergies                                                                 |                                                            | recurrent sinusitis, H. pylori associated gastritis, hepatomegaly |                                                                   |                                                               | bacteremia, hematogenous spread of M. massilense | H. pylori gastritis |              |
| Treatment                                  | HSCT, Prophylactic antibacterial therapy and IVIG     | Prophylactic antibacterial therapy and IVIG | Prophylactic antibacterial therapy and IVIG | Steroids, Prophylactic antibacterial therapy and IVIG | HSCT, prophylactic antibacterial therapy, Voriconazole and IVIG | Omalizumab, Prophylactic antibacterial therapy and IVIG                  | Liver transplant at age 4 y                                                    | HSCT                                                       | Prophylactic antibacterial therapy and IVIG                       | Prophylactic antibacterial therapy and IVIG                       | HSCT, prophylactic antibacterial therapy, IVIG                | HSCT                                             | HSCT                | HSCT         |
| Outcome                                    | died due to pulmonary aspergillosis day +61 post HSCT | alive                                       | died due to severe diarrhea                 | died due to pulmonary complications                   | died due to multiorgan failure day +55 post HSCT                | alive                                                                    | died due to bacteremia, systemic CMV infection and multiorgan failure day +542 | died due to multiorgan failure and graft rejection day +84 | died due to liver and respiratory failure                         | died due to infectious complications with liver and renal failure | died due to severe digestive GvHD/CMV ARDS day +149 post HSCT | alive                                            | alive               |              |

n/p, not published; n/a, not applicable, \* age at time of death; \*\* age at clinical description; \*\*\*asymptomatic; CMV, cytomegaly virus; HSCT, hematopoietic stem cell transplantation; IVIG, intravenous immunoglobulin substitution; ARDS, acute respiratory distress syndrome

Table II. Details of HSCT and Clinical Course of Transplanted IL21R-Deficient Patients

| Patient no. | Age at HSCT | Organ damage prior to HSCT                      | HSCT conditioning regime                                                                         | GvHD prophylaxis | HSCT source |                            | Complications                  |                                              |                                                                                              | Clinical outcome, follow up time    |
|-------------|-------------|-------------------------------------------------|--------------------------------------------------------------------------------------------------|------------------|-------------|----------------------------|--------------------------------|----------------------------------------------|----------------------------------------------------------------------------------------------|-------------------------------------|
|             |             |                                                 |                                                                                                  |                  | Donor       | cell source, cells/kg      | Engraftment (neutrophil)       | GvHD                                         | Other                                                                                        |                                     |
| 1           | 12 y 11 mo  | Bronchiectasis, cholangitis, hepatic transplant | Fludarabine (150 mg/m <sup>2</sup> )<br>Treosulfan (108 g/m <sup>2</sup> )                       | MTX              | 10/10 MSD   | UNKNOWN BMC                | Failed                         | No                                           | Failure to engraft, severe pulmonary aspergillosis,                                          | died on day 61 post HSCT            |
| 5           | 20 y 2 mo   | Bronchiectasis                                  | Fludarabine (150 mg/m <sup>2</sup> )<br>Melphalan (100 mg/m <sup>2</sup> )                       | CSA, MTX         | 10/10 MFD   | 8 x 10 <sup>6</sup> BMC    | Failed                         | No                                           | Failure to engraft, severe bact. infections, PRES, CMV reactivation, ARDS                    | died on day 55 post HSCT            |
| 11          | 15 y 6 mo   | Bronchiectasis, lung resection, cholangitis     | Fludarabine (180 mg/m <sup>2</sup> )<br>Busulfan<br>(AUC 12 000 microM.min)                      | CSA, MMF         | 10/10 MSD   | 6.5 x 10 <sup>6</sup> PBSC | Yes, day +14                   | Acute GvHD, grade IV: skin, GI, liver (D+40) | CMV reactivation associated ARDS                                                             | died on day 149 post HSCT           |
| 12          | 9 y 3 mo    | Bronchiectasis                                  | Fludarabine (150 mg/m <sup>2</sup> )<br>Treosulfan (42 g/m <sup>2</sup> )<br>Thiotepa (10 mg/kg) | CSA, MMF         | 12/12 MSD   | 2.5 x 10 <sup>6</sup> BMC  | Yes, day +14                   | No                                           | CMV reactivation                                                                             | clinical remission, IVIG not needed |
| 13          | 2 y 6 mo    | No                                              | Fludarabine (150 mg/m <sup>2</sup> )<br>Treosulfan (42 g/m <sup>2</sup> )<br>Thiotepa (10 mg/kg) | CSA, MMF         | 12/12 MSD   | 1.04 x 10 <sup>6</sup> BMC | Yes, day +14                   | No                                           | No                                                                                           | clinical remission, IVIG not needed |
| 8           | 10 y        | Cholangitis, liver fibrosis                     | not published                                                                                    | not published    | HLA matched | not published              | 1st HSCT: yes<br>2nd HSCT: n/p | No                                           | increased cholangitis, CMV infection, graft rejection, required 2nd HSCT, multiorgan failure | died on day 84 post HSCT            |

HSCT, hematopoietic stem cell transplantation; AUC, area under the curve; MTX, methotrexate; CSA, cyclosporine A; MMF, mycophenolic acid; MSD, matched sibling donor; MFD, matched family donor; BMC, bone marrow cells; GvHD, graft versus host disease; GI, gastrointestinal; PRES, posterior reversible encephalopathy syndrome; CMV, cytomegaly virus; ARDS, acute respiratory distress syndrome; IVIG intravenous immunoglobulin substitution

Supplementary Table I. Sequences of primers used in targeted sequencing of IL21R

| Patient ID | FW Primer            | RV Primer            |
|------------|----------------------|----------------------|
| P1, P2     | CAGGACTGTGAGTGGCTGAA | GGGTGGCTAGAACAGGACAA |
| P4         | CAGCAAATTCTCACCCCAT  | CTTGGCCATGAATGATGTTG |
| P5         | AGAGCTGCTGCCCTAAATGA | CATCCATGTGGCAGGTGTAG |
| P6         | CAGACTAAAGCCACCCCTTG | GACCTTGTCTCTGGCTCAGG |
| P9/P10     |                      |                      |
| P11        | TCTCGATCTCTGACCTCGT  | GCCCTTGGTCTCTGTTCTTG |
| P13        |                      |                      |

Supplementary Table II. Genetics of novel and published patients with IL21R deficiency

| Patient | Defect                                   | Exon       | Domain                    | Diagnosis                                       | Reference |
|---------|------------------------------------------|------------|---------------------------|-------------------------------------------------|-----------|
| P1,2,3  | c.535delG<br>(D179Tfs*51)                | Exon 6     | Fibronectin III<br>type 2 | Haloplex target<br>enriched NGS                 | 21        |
| P4      | c.473T>C<br>(L158P)                      | Exon 5     | Fibronectin III<br>type 2 | Whole Exome<br>Sequencing                       | novel     |
| P5      | c.153-1G>T<br>(splicing aberrant)        | Intron 3-4 | Fibronectin III<br>type 1 | Whole Exome<br>Sequencing                       | 19        |
| P6      | c.1421C>G<br>(S474*)                     | Exon 9     | Cytoplasmic<br>domain     | Haloplex target<br>enriched NGS                 | novel     |
| P7,8    | c.602G>T<br>(R201L)                      | Exon 6     | Fibronectin III<br>type 2 | Whole Exome<br>Sequencing                       | 20        |
| P9,10   | c.240_245<br>delCTGCCA<br>(p.C81-H82del) | Exon 4     | Fibronectin III<br>type 1 | targeted IL21R<br>sequencing                    | 20        |
| P11     | c.416G>C<br>(W138S)                      | Exon 5     | Fibronectin III<br>type 2 | Flow cytometry,<br>targeted IL21R<br>sequencing | 23        |
| P12,13  | c.602G>A<br>(R201Q)                      | Exon 6     | Fibronectin III<br>type 2 | Whole Exome<br>Sequencing                       | 22        |

NGS, next generation sequencing

Supplementary Table III. Laboratory features of patients with IL21R deficiency

| Patient | WBC                    | ALC  | ANC     | IgA<br>mg/dl     | IgG<br>mg/dl        | IgM<br>mg/dl      | IgE                 | CD3+                          | CD4+                          | CD8+                          | CD16+CD56+               | CD19+                        | DNT |
|---------|------------------------|------|---------|------------------|---------------------|-------------------|---------------------|-------------------------------|-------------------------------|-------------------------------|--------------------------|------------------------------|-----|
| P1      | 18 000                 | 3500 | 13700   | 100<br>(44-244)  | 92<br>(44-244)      | 711<br>(640-1040) | 144<br>(-150)       | 84%(60-76)<br>2940(1200-2600) | 17%(31-47)<br>595(650-1500)   | 46%(18-35)<br>1610(370-1100)  | 1%(4-17)<br>35(100-480)  | 15%(13-27)<br>525(270-860)   | -   |
| P2      | 13600                  | 7500 | 4900    | 69<br>(7-123)    | 1460<br>(304-1231)  | 105<br>(32-203)   | 3<br>(-150)         | 57%(49-76)<br>4275(3400-9000) | 38%(31-56)<br>2850(1400-4300) | 15%(12-24)<br>1125(500-1700)  | 3%(3-15)<br>225(160-950) | 38%(14-37)<br>2850(610-2600) | -   |
| P3      | 12300                  | 5300 | 5900    | 45<br>(70-303)   | 442<br>(764-2134)   | 24<br>(69-387)    | 255<br>(-150)       | 83%(60-76)<br>4399(1200-2600) | 44%(31-47)<br>2332(650-1500)  | 37%(18-35)<br>1961(370-1100)  | 2%(4-17)<br>106(100-480) | 15%(13-27)<br>1007(270-860)  | -   |
| P4      | 5300                   | 1400 | 2900    | 28<br>(44-244)   | 780<br>(745-1804)   | 60<br>(78-261)    | 40<br>(-150)        | 81%(54-76)<br>1134(1600-6700) | 40%(31-54)<br>560(1000-4600)  | 36%(12-28)<br>504(400-2100)   | 2%(3-22)<br>28(200-1200) | 7%(15-39)<br>98(600-2700)    | -   |
| P5      | 2900                   | 690  | unknown | 23<br>(139-378)  | 688<br>(913-1884)   | 435<br>(88-322)   | 9<br>(-150)         | 74%(56-94)<br>510(1000-2200)  | 25%(31-52)<br>165(530-1300)   | 41%(18-35)<br>276(330-920)    | 9%(3-22)<br>62(70-480)   | 8%(6-23)<br>60(110-570)      | +   |
| P6      | 11300                  | 2100 | 8200    | 100<br>(139-378) | 500<br>(913-1884)   | 60<br>(88-322)    | 500-30000<br>(-150) | 78%(66-76)<br>1482(1400-2000) | 43%(33-41)<br>817(700-1100)   | 30%(27-35)<br>570(600-900)    | 5%(9-16)<br>95(200-300)  | 17%(12-22)<br>323(300-500)   | -   |
| P7      | n/p                    | n/p  | n/p     | normal           | normal              | 317<br>(38-150)   | 1360<br>(2-60)      | n/p                           | n/p                           | n/p                           | n/p                      | elevated                     | -   |
| P8      | n/p                    | n/p  | n/p     | normal           | 495<br>(520 - 1290) | normal            | 2010<br>(6-120)     | normal                        | n/p                           | n/p                           | normal                   | normal                       | +   |
| P9      | 11250                  | 1450 | 8370    | 187<br>(90-450)  | 625<br>(800-1800)   | 133<br>(60-250)   | 3669<br>(-150)      | 83%(56-84)<br>1159(1000-2200) | 37%(31-52)<br>760(530-1300)   | 22%(18-35)<br>325(330-920)    | 8%(6-27)<br>122(70-1200) | 11%(3-19)<br>162(110-570)    | +   |
| P10     | 6530                   | 1161 | 3920    | 29<br>(74-260)   | 29<br>(730 - 1400)  | 26<br>(68-175)    | 146<br>(-150)       | 55%(60-76)<br>634(1200-2600)  | 46%(31-47)<br>533(650-1500)   | 9%(18-35)<br>105(370-1300)    | 3%(6-27)<br>33(70-1200)  | 20%(9-11)<br>226(270-860)    | -   |
| P11     | unknown<br>(1700-2800) | 2200 | unknown | 67<br>(74-260)   | 590<br>(730 - 1410) | 32<br>(68-1750)   | 34.7<br>(-150)      | 71%(81-83)<br>1562(1411-2268) | 37%(43-53)<br>1125(901-1204)  | 25%(26-35)<br>550(442-980)    | 9%(7-8)<br>198(119-224)  | 18%(9-11)<br>396(170-308)    | -   |
| P12     | unknown<br>(1800-5000) | 3700 | unknown | 27<br>(30-188)   | 221<br>(540-1340)   | 307<br>(42-170)   | 60<br>(-150)        | unknown                       | 42%(26-41)<br>1565(641-1453)  | 26%(13-47)<br>973(200-1700)   | 3%(2-31)<br>115(70-500)  | 10%(9-20)<br>381(296-784)    | -   |
| P13     | unknown                | 9600 | unknown | unknown          | low                 | unknown           | unknown             | 74%<br>unknown                | 39%(38-46)<br>3744(1800-4000) | 16.3%(6-41)<br>1505(600-1600) | 0.25%(3-14)<br>unknown   | 21(21-41)<br>1968(430-3000)  | -   |

values lower than reference values are indicated in red, values higher than reference values are indicated in blue.
